# Supplementary material
Source: publisher site journal article supplement (https://www.dovepress.com/article/479014)
Supplement: Supplementary file 1 [file get_supplementary_file.php]

Table S1 The sequences of primers

| Gene | Primer | Primer sequence（5' to 3'） |
| --- | --- | --- |
| FFAR3 | Forward | ACTGGAAATGGCTGTGGTCC |
| FFAR3 | Reverse | CTCCCTGGCTCAGAATCCAC |
| FFAR2 | Forward | CCCGGTGCAGTACAAGCTAT |
| FFAR2 | Reverse | CTGCTCGGTTGAGTTCAGGT |
| HCAR2 | Forward | GGCACGATGCAATGTTCCTC |
| HCAR2 | Reverse | CTTGACGTGCCTGTCCATCT |
| IL1B | Forward | ATCTCACAGCAGCATCTCGACAAG |
| IL1B | Reverse | CACACTAGCAGGTCGTCATCATCC |
| IL6 | Forward | AGAGACTTCCAGCCAGTTGC |
| IL6 | Reverse | AGTCTCCTCTCCGGACTTGT |
| IL18 | Forward | CTGCCATACCAGAAGAAGGCTC |
| IL18 | Reverse | AAGTCTGCCAAAGTGGTCTGAT |
| CCL2 | Forward | TCAACCCTAAGGACTTCAGCAC |
| CCL2 | Reverse | GCTTGAGGTGGTTGTGGAAAAG |
| GAPDH | Forward | GAAGCTGGTCATCAACGGGA |
| GAPDH | Reverse | ACGACATACTCAGCACCAGC |
